# Supplementary material
Source: Royal Society of Chemistry journal article supplement (doi:10.1039/d5fb00611b)
Supplement: d5fb00611b1.pdf [file d5fb00611b1.pdf]

## Supplementary information

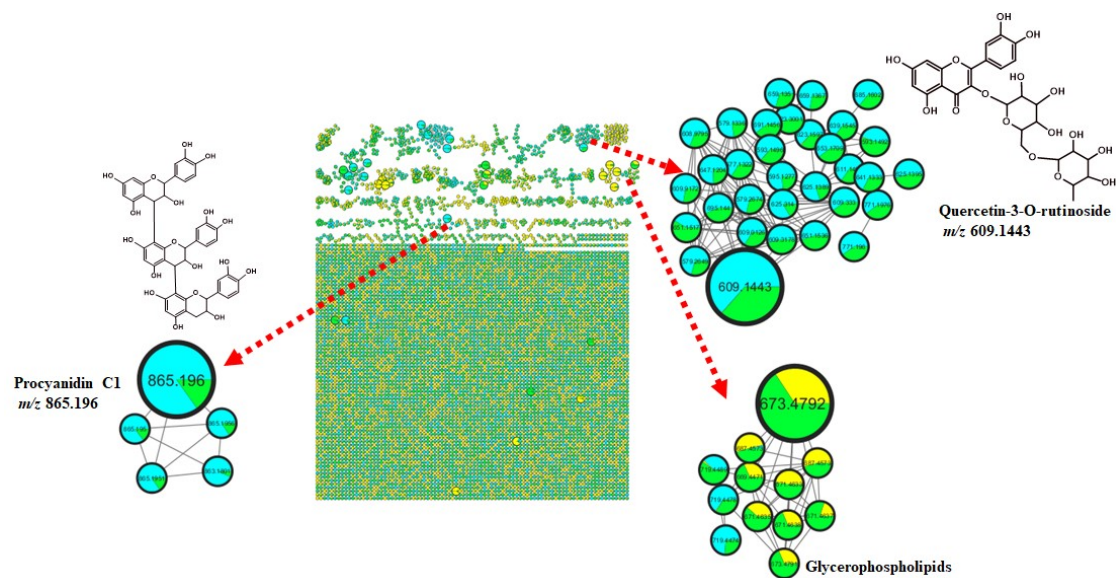

**Figure S1** Feature-based molecular network of additional clusters observed in *Vigna subterranea* (red variety) comparing dehulled and malted to the control, generated from the UHPLC-qTOF-MS data.
